# Supplementary material for: Age at Diabetes Diagnosis and Cognitive Function Among Older Adults in the China Health and Retirement Longitudinal Study, 2011–2018
Source: Research Square preprint supplement (doi:10.21203/rs.3.rs-7590094/v1), 2025-10-08
Supplement: Supplementary file 1 [file ac6c2ac4a79003210f669c7c.docx]

**Table of Contents**

Table S1 Subgroup analysis of the association between age at diabetes diagnosis and standardized composite cognitive function scores, stratified by male or female residence, CHARLS, China, 2011–2018.......................................................................2

Table S2 Subgroup analysis of the association between age at diabetes diagnosis and standardized composite cognitive function scores, stratified by age groups, CHARLS, China, 2011–2018.........................................................................................................3

Figure Predicted cognitive function over time by gender............................................4

Table S1 Subgroup analysis of the association between age at diabetes diagnosis and standardized composite cognitive function scores, stratified by male or female residence, CHARLS, China, 2011–2018

| **Subgroup** | **Predictor** | **Estimate (β)** | **Std. Error** | **95% CI (lower)** | **95% CI (upper)** | ***p***-value |
| --- | --- | --- | --- | --- | --- | --- |
| Female | Years of follow-up | 0.004 | 0.006 | -0.007 | 0.016 | 0.455 |
|  | Diabetes | 0.006 | 0.069 | -0.130 | 0.142 | 0.929 |
|  | Education | 0.580 | 0.033 | 0.515 | 0.644 | <0.001 |
|  | Hypertension | -0.023 | 0.050 | -0.121 | 0.074 | 0.637 |
|  | Age | -0.077 | 0.003 | -0.084 | -0.071 | <0.001 |
|  | Smoking | -0.268 | 0.095 | -0.453 | -0.083 | 0.005 |
|  | Drinking | -0.027 | 0.047 | -0.118 | 0.065 | 0.566 |
|  | Marry | 0.041 | 0.077 | -0.110 | 0.192 | 0.593 |
|  | Residence | -0.834 | 0.059 | -0.949 | -0.718 | <0.001 |
| Male | **Years of follow-up** | 0.065 | 0.007 | 0.051 | 0.078 | <0.001 |
|  | Diabetes | 0.259 | 0.088 | 0.087 | 0.431 | 0.003 |
|  | Education | 0.648 | 0.037 | 0.576 | 0.719 | <0.001 |
|  | Hypertension | 0.035 | 0.057 | -0.076 | 0.147 | 0.536 |
|  | Age | -0.113 | 0.004 | -0.120 | -0.106 | <0.001 |
|  | Smoking | -0.168 | 0.065 | -0.296 | -0.040 | 0.010 |
|  | Drinking | 0.026 | 0.052 | -0.075 | 0.127 | 0.617 |
|  | Marry | 0.069 | 0.080 | -0.089 | 0.226 | 0.392 |
|  | Residence | -1.694 | 0.069 | -1.829 | -1.559 | <0.001 |

Table S2 Subgroup analysis of the association between age at diabetes diagnosis and standardized composite cognitive function scores, stratified by age groups, CHARLS, China, 2011–2018

| **Subgroup** | **Predictor** | **Estimate (β)** | **Std. Error** | **95% CI (lower)** | **95% CI (upper)** | **p-value** |
| --- | --- | --- | --- | --- | --- | --- |
| 45-59 | Years of follow-up | 0.047 | 0.006 | 0.035 | 0.060 | <0.001 |
|  | Diabetes | 0.209 | 0.078 | 0.057 | 0.362 | 0.007 |
|  | Gender | -0.723 | 0.075 | -0.871 | -0.575 | <0.001 |
|  | Education | 0.530 | 0.029 | 0.472 | 0.588 | <0.001 |
|  | Hypertension | 0.030 | 0.051 | -0.069 | 0.129 | 0.550 |
|  | Age | -0.094 | 0.005 | -0.104 | -0.084 | <0.001 |
|  | Smoking | -0.094 | 0.068 | -0.227 | 0.039 | 0.167 |
|  | Drinking | 0.035 | 0.046 | -0.055 | 0.124 | 0.448 |
|  | Marry | 0.076 | 0.065 | -0.052 | 0.204 | 0.245 |
|  | Residence | -1.104 | 0.054 | -1.209 | -0.999 | <0.001 |
| 60-74 | Years of follow-up | 0.022 | 0.009 | 0.005 | 0.039 | 0.011 |
|  | Diabetes | 0.061 | 0.081 | -0.098 | 0.221 | 0.453 |
|  | Gender | -1.176 | 0.097 | -1.367 | -0.986 | <0.001 |
|  | Education | 0.754 | 0.042 | 0.673 | 0.835 | <0.001 |
|  | Hypertension | 0.021 | 0.058 | -0.093 | 0.135 | 0.713 |
|  | Age | -0.111 | 0.007 | -0.125 | -0.097 | <0.001 |
|  | Smoking | -0.321 | 0.084 | -0.485 | -0.156 | <0.001 |
|  | Drinking | -0.014 | 0.057 | -0.126 | 0.097 | 0.799 |
|  | Marry | 0.104 | 0.112 | -0.115 | 0.323 | 0.351 |
|  | Residence | -1.301 | 0.072 | -1.443 | -1.159 | <0.001 |
| ≥75 | Years of follow-up | 0.088 | 0.028 | 0.032 | 0.144 | 0.002 |
|  | Diabetes | 0.127 | 0.250 | -0.363 | 0.618 | 0.611 |
|  | Gender | -0.851 | 0.257 | -1.354 | -0.347 | 0.001 |
|  | Education | 0.803 | 0.124 | 0.560 | 1.045 | <0.001 |
|  | Hypertension | 0.086 | 0.169 | -0.246 | 0.419 | 0.611 |
|  | Age | -0.202 | 0.027 | -0.254 | -0.150 | <0.001 |
|  | Smoking | -0.318 | 0.215 | -0.739 | 0.103 | 0.139 |
|  | Drinking | -0.228 | 0.174 | -0.568 | 0.113 | 0.190 |
|  | Marry | -0.158 | 0.518 | -1.175 | 0.858 | 0.760 |
|  | Residence | -1.687 | 0.213 | -2.104 | -1.269 | <0.001 |


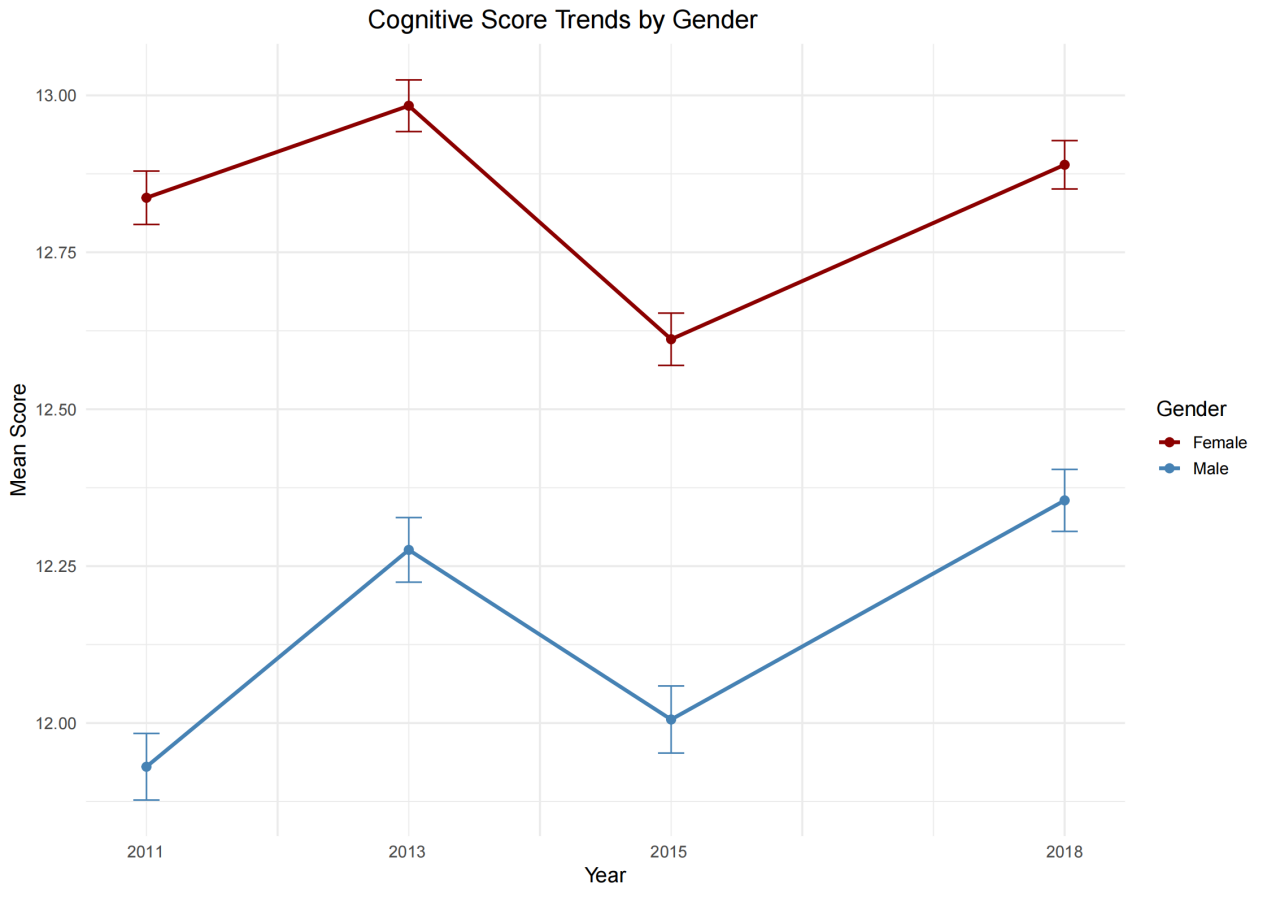


FIGURE S1 Predicted cognitive function over time by gender
